# Supplementary material
Source: PubMed Central journal article supplement (PMC3760595)

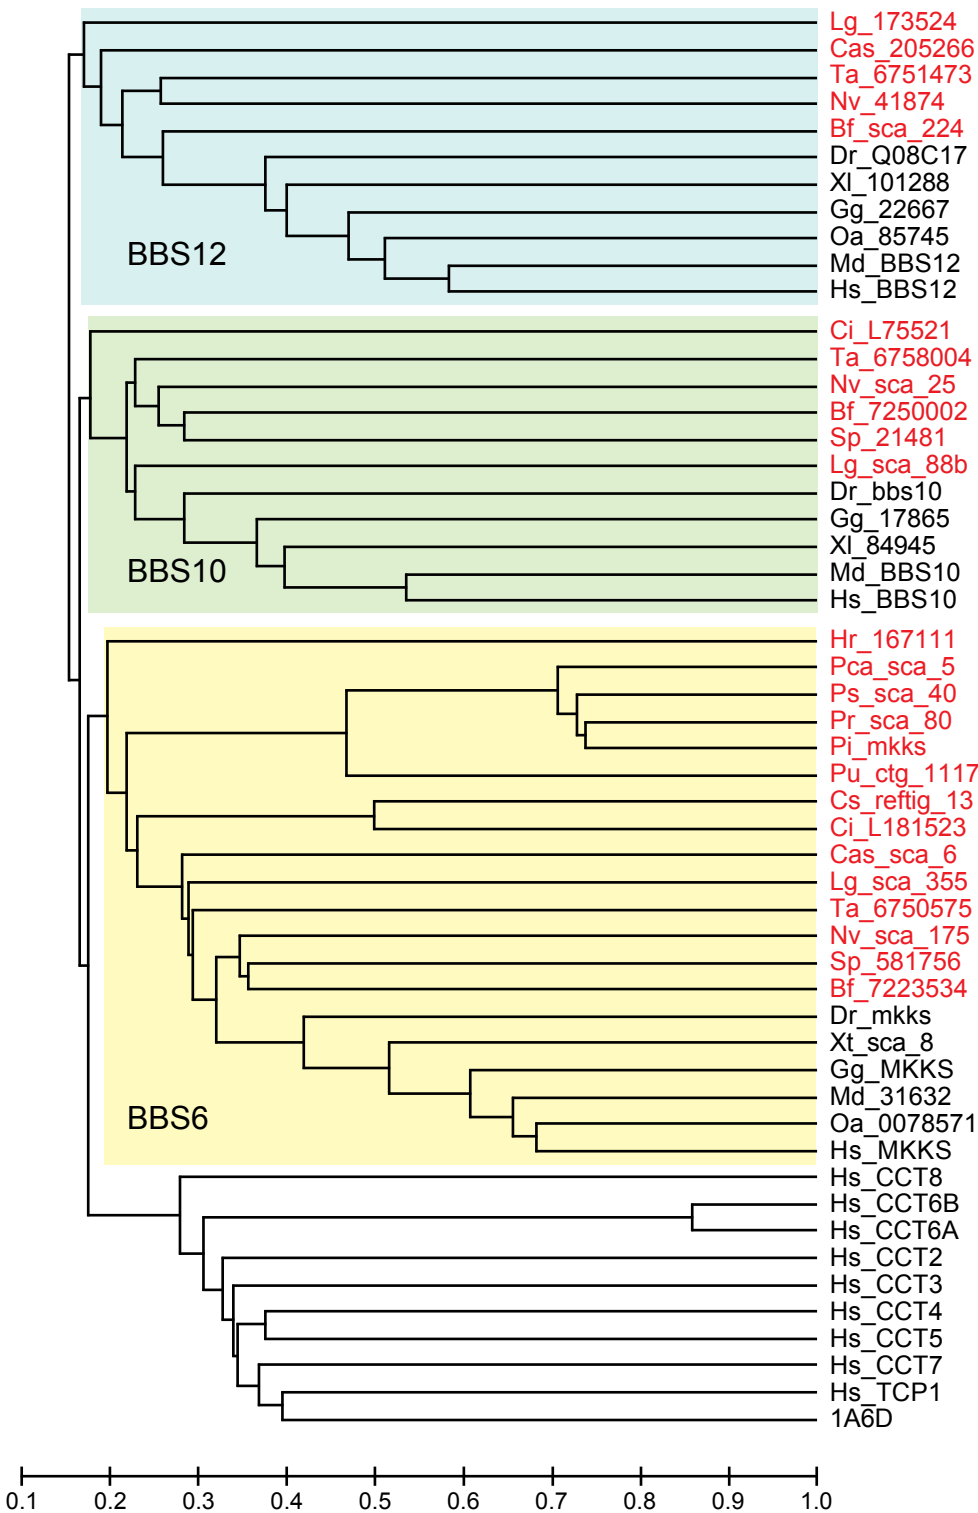

Supplement: NIHMS493880-supplement-Suppl__Figure_S3.pdf [file NIHMS493880-supplement-Suppl__Figure_S3.pdf]
